# Supplementary material for: The use of spatial and genetic tools to assess Plasmodium falciparum transmission in Lusaka, Zambia between 2011 and 2015
Source: Springer Nature journal article supplement (doi:10.1186/s12936-020-3101-7), 2020-01-15
Supplement: MOESM1 [file 17641774]

### Household form

HOUSE (1-10 for each response. Index house is #1)

| Date *     |  | Index Case Name      |  | Responding Health Facility |  |
|------------|--|----------------------|--|----------------------------|--|
| (dd/mm/yy) |  | (Surname, Firstname) |  |                            |  |

| House Details                                         |  |                                                                                 |                                           |                                             |                                             |                                                    |  |
|-------------------------------------------------------|--|---------------------------------------------------------------------------------|-------------------------------------------|---------------------------------------------|---------------------------------------------|----------------------------------------------------|--|
| Household Head<br><small>(Surname, Firstname)</small> |  | GPS co-ordinates<br><small>(Left-hand corner from doorway of structure)</small> | - . - - - / . - - -<br>Latitude Longitude | Previous IRS<br><small>(circle one)</small> | <div>Y</div> <div>N</div> <div>Unsure</div> | Previous IRS date<br><small>(# months ago)</small> |  |

[illegible]

\*please list all dates as Day/Month/Year e.g. 20/02/11 unless otherwise indicated

| Interventions                           |  |                       |  |
|-----------------------------------------|--|-----------------------|--|
| Number of nets distributed to household |  | Other recommendations |  |
