# Supplementary material for: The use of spatial and genetic tools to assess Plasmodium falciparum transmission in Lusaka, Zambia between 2011 and 2015
Source: Springer Nature journal article supplement (doi:10.1186/s12936-020-3101-7), 2020-01-15
Supplement: MOESM2 [file 17641774]

### Index case form

|        |  |                        |  |
|--------|--|------------------------|--|
| Date * |  | Health Facility / Dept |  |
|--------|--|------------------------|--|

\*please list all dates as Day/Month/Year e.g. 20/02/11

| Patient Identity |            |                 |                     |
|------------------|------------|-----------------|---------------------|
| Surname          | First Name | Date of Birth * | Sex<br>(circle one) |
|                  |            |                 | M                   |
|                  |            |                 | F                   |

| Diagnostics and Treatment      |          |                      |           |                                        |                    |            |                 |          |                 |                   |                 |
|--------------------------------|----------|----------------------|-----------|----------------------------------------|--------------------|------------|-----------------|----------|-----------------|-------------------|-----------------|
| Symptoms (tick all that apply) |          |                      |           |                                        |                    |            |                 |          |                 |                   |                 |
| Fever                          | Headache | Cough                | Diarrhoea | Vomiting                               | Problems breathing | Chest Pain | Other (specify) |          |                 |                   |                 |
|                                |          |                      |           |                                        |                    |            |                 |          |                 |                   |                 |
| Test Type<br>(tick one)        |          | Result<br>(tick one) |           | Treatment provided today<br>(tick one) |                    |            |                 |          |                 |                   |                 |
|                                |          |                      |           | Coartem (pack size)                    |                    |            |                 | Fansidar | Quinine Tablets | Quinine Injection | Other (specify) |
| RDT                            |          | Positive             |           | 6                                      | 12                 | 18         | 24              |          |                 |                   |                 |
| Microscopy                     |          | Negative             |           |                                        |                    |            |                 |          |                 |                   |                 |

| Travel History (in last 1 month)                                                                                                                     |  |                               |   |  |  |
|------------------------------------------------------------------------------------------------------------------------------------------------------|--|-------------------------------|---|--|--|
| Has this person travelled outside Lusaka in the last month?<br>(circle one)                                                                          |  | Y                             | N |  |  |
|                                                                                                                                                      |  | If Yes, fill in details below |   |  |  |
| Places Travelled To Outside of Lusaka<br>Use one line per trip and be specific e.g. country, or if within Zambia then district or at least Province) |  |                               |   |  |  |
|                                                                                                                                                      |  |                               |   |  |  |
|                                                                                                                                                      |  |                               |   |  |  |
|                                                                                                                                                      |  |                               |   |  |  |
|                                                                                                                                                      |  |                               |   |  |  |
|                                                                                                                                                      |  |                               |   |  |  |
| Total number of days spent outside Lusaka in the last 1 month:                                                                                       |  |                               |   |  |  |

| Malaria History (in last 1 month)                                  |          |                               |                                       |
|--------------------------------------------------------------------|----------|-------------------------------|---------------------------------------|
| Has this person had any Malaria in the last month?<br>(circle one) |          | Y                             | N                                     |
|                                                                    |          | If Yes, fill in details below |                                       |
| Treatment Taken<br>(tick all that apply)                           |          |                               | Diagnosed by<br>(tick all that apply) |
| Coartem                                                            | Fansidar | Quinine                       | Other (specify)                       |
|                                                                    |          |                               |                                       |
|                                                                    |          |                               |                                       |

| Patient Household Location and Contact Information  |  |
|-----------------------------------------------------|--|
| Physical Address<br>(include landmarks as required) |  |
| Contact Telephone Number                            |  |

| Response to Index case               |   |                                   |   |
|--------------------------------------|---|-----------------------------------|---|
| Net given to patient<br>(circle one) | Y | Response required<br>(circle one) | Y |
|                                      | N |                                   | N |
